# Supplementary material
Source: HighWire-hosted journal article supplement (https://jnm.snmjournals.org/highwire/filestream/95311/field_highwire_adjunct_files/0/203489_Supplemental_Data.pdf)
Supplement: 203489_Supplemental_Data.pdf [file 203489_Supplemental_Data.pdf]

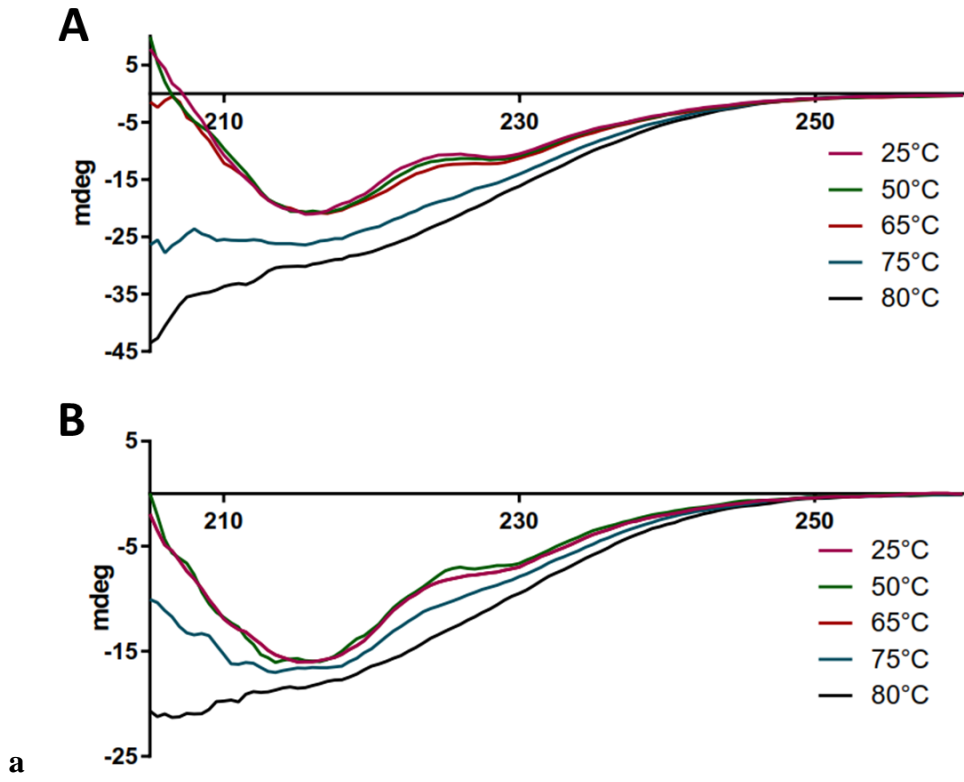

**Supplemental Figure 1.** Evaluation of thermal stability of A1 (A) and C6 (B) sdAbs by circular dichroism from 25°C to 80°C.

|                      | RadioChemical Purity (%) |          | Lipophilicity |
|----------------------|--------------------------|----------|---------------|
|                      | After Radiolabeling      | 6 h      | Log <i>P</i>  |
| <sup>99m</sup> Tc-A1 | 99.7±0.1                 | 99.2±0.1 | -1.8±0.5      |
| <sup>99m</sup> Tc-C6 | 99.1±0.8                 | 98.8±0.5 | -2.3±0.8      |

**Supplemental Table 1.** Radiochemical purity and partition coefficient (Log *P*) of <sup>99m</sup>Tc-A1 and <sup>99m</sup>Tc-C6. Data are presented as mean ± Standard Deviation (n = 3).

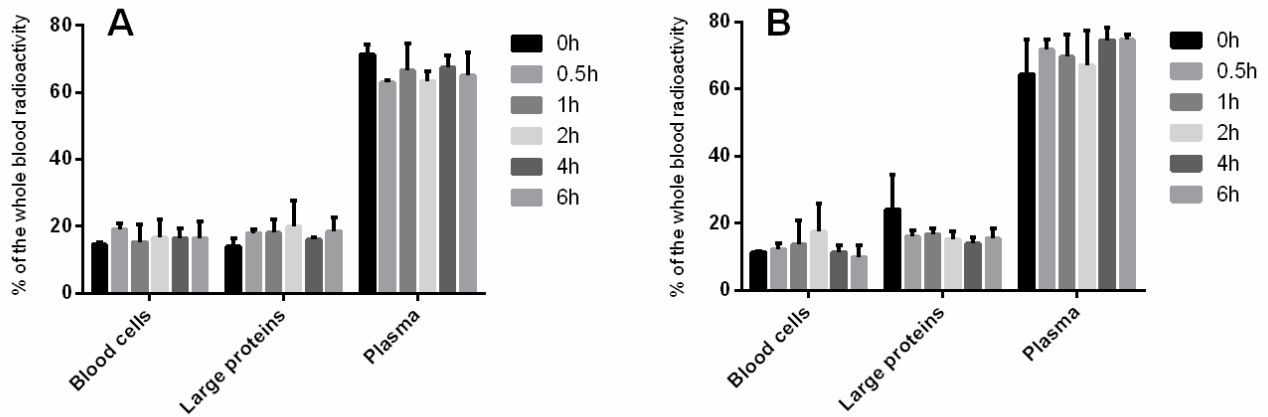

**Supplemental Figure 2.** *In vitro* blood distribution patterns of  $^{99m}\text{Tc-A1}$  (A) and  $^{99m}\text{Tc-C6}$  (B) following incubation with whole human blood. Results were expressed as a % of whole blood radioactivity (mean  $\pm$  Standard Deviation, n=3).

| Time                 | 0h       | 0.5h     | 1h       | 2h       | 4h       | 6h       |
|----------------------|----------|----------|----------|----------|----------|----------|
| <sup>99m</sup> Tc-A1 | 99.8±0.1 | 99.8±0.1 | 99.7±0.1 | 99.2±0.6 | 98.7±0.3 | 98.8±0.5 |
| <sup>99m</sup> Tc-C6 | 99.6±0.1 | 99.8±0.1 | 99.2±0.5 | 98.6±0.4 | 98.2±0.3 | 98.0±0.2 |

**Supplemental Table 2.** *In vitro* stability of <sup>99m</sup>Tc-A1 and <sup>99m</sup>Tc-C6 in human blood. The zero time point refers to the stability observed immediately following contact with human blood. Results are expressed as a % of intact radiolabeled sdAb in the remaining plasma fraction. Experiments were performed in triplicate.

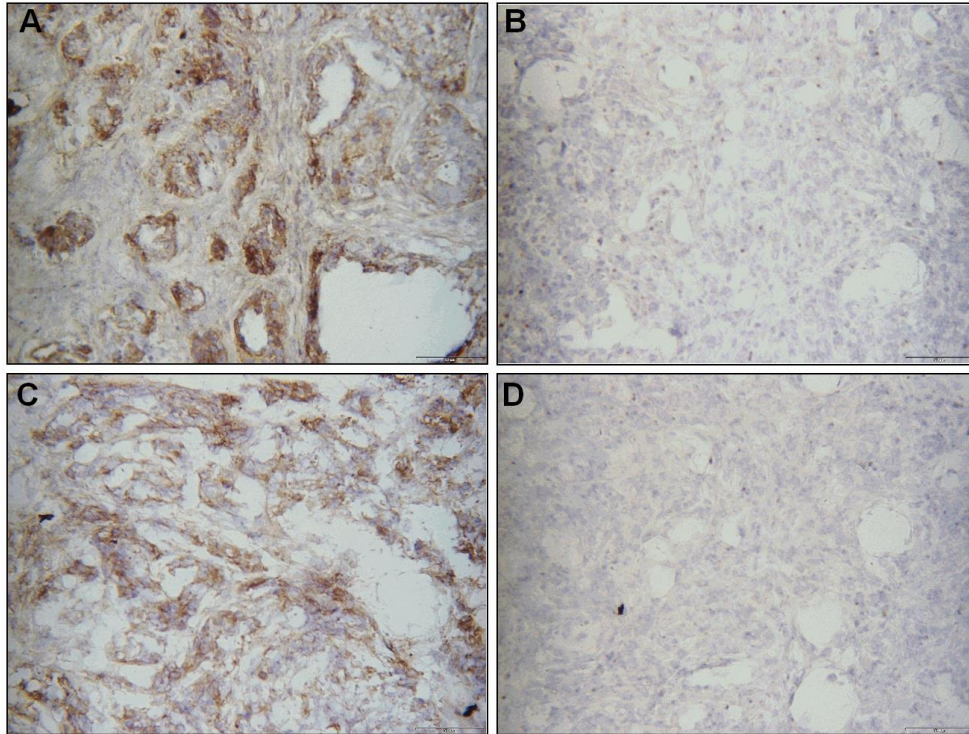

**Supplemental Figure 3.** Determination of mesothelin expression by ex vivo immunohistochemistry on HCC70 (A, C) or MDA-MB-231 (B, D) tumors, performed with commercial antibody (a, b) or A1 sdAb (c, d). Representative image (x20) of HCC70 (A, C) or MDA-MB-231 tumor (B, D) with mesothelin staining. HCC70 and MDA-MB-231 tumors were fixed using acetone for 10 minutes at -20 °C and 10- $\mu$ m thick cryosections were obtained. Immunohistochemistry was performed using A1 sdAb (20  $\mu$ g/mL) or commercial anti-mesothelin antibody polyclonal anti-mesothelin (0.5  $\mu$ g/mL, Boster immunoleader). For the A1 assay, tumors were then incubated with a rabbit anti-histidine antibody (1/200, anti-6x His tag® antibody, ab9108 Abcam). In both cases, the revelation was performed using a biotinylated antibody goat anti-Rabbit IgG (1/500, BA-1000, Vector), followed by DAB coloration (Vector).

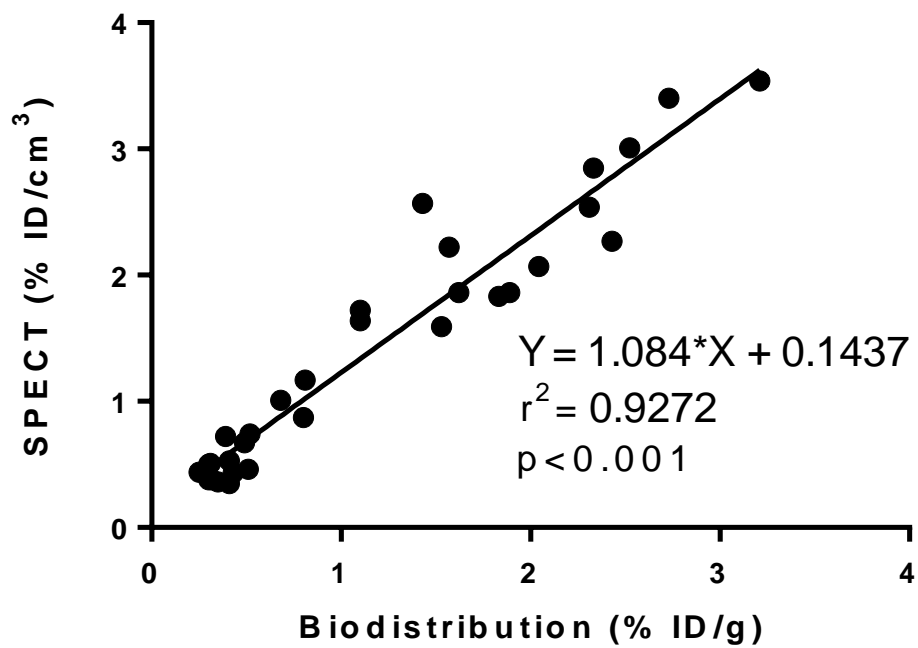

**Supplemental Figure 4.** Correlation between tumor uptake assessed by SPECT and biodistribution.
